# Supplementary material
Source: PubMed Central journal article supplement (PMC4241116)

**Supplementary Figure 1:** Regional compartment definition in the Fenland DXA data. The trunk region extends from the chin to the top of the pelvis. The leg regions are defined by a cut across the femoral neck, not touching the pelvis. The arm regions are defined by a cut placed as close to the body as possible. The android region is a quadrilateral box, where the lower boundary is the pelvis, the lateral boundaries are the arm cuts and the upper boundary is above the pelvis cut by 20% of the distance between the pelvis and neck cuts. The gynoid region is another quadrilateral box where the lateral boundaries are the arm cuts. The upper boundary is below the pelvis cut by 1.5 x the height of the android region. The Lower boundary is below the upper boundary by 2 x the height of the android region.

**Supplementary Figure 2:** Histograms of genetic risk scores from each study for a) insulin secretion and b) insulin resistance scores.

# Online Supplementary figure 1

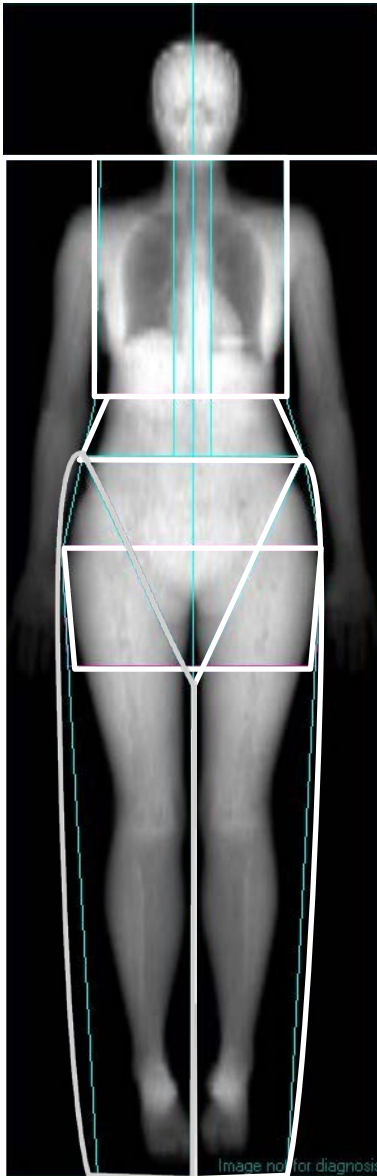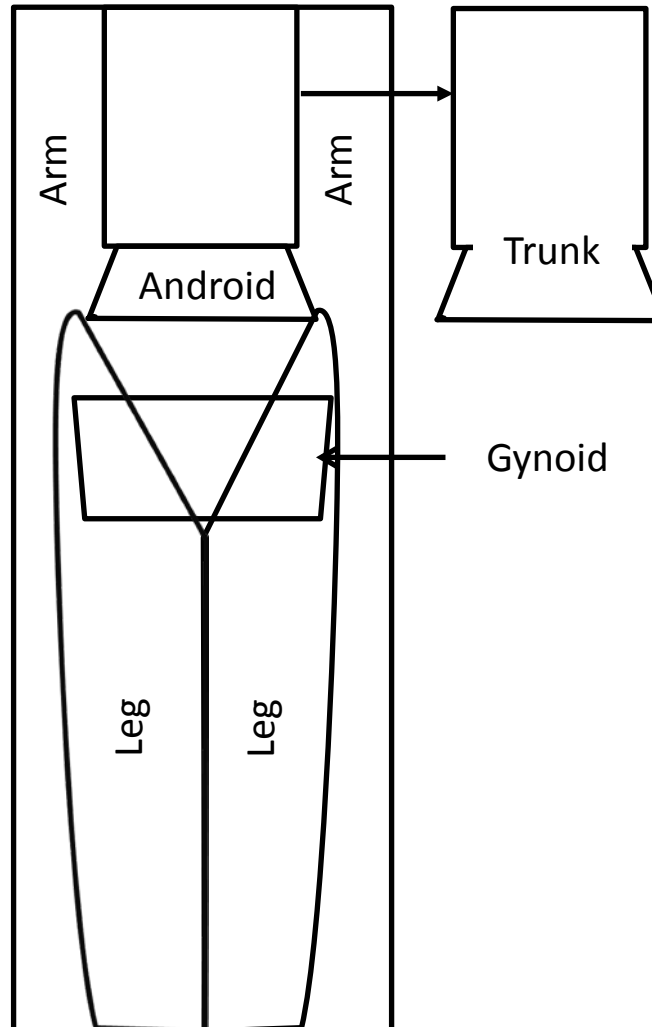

# Online Supplementary figure 2a

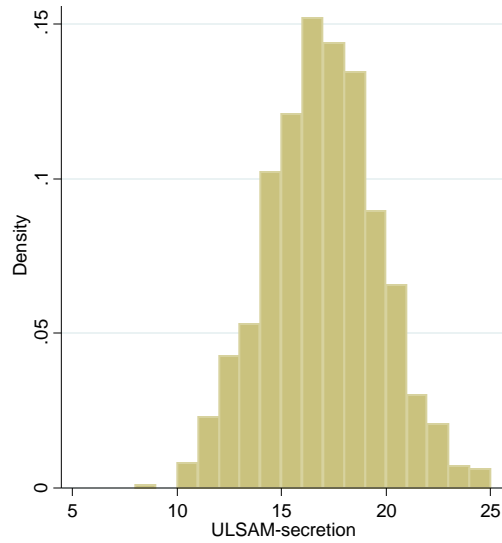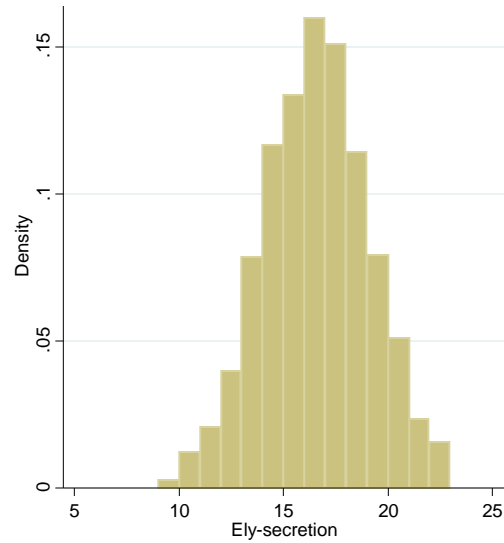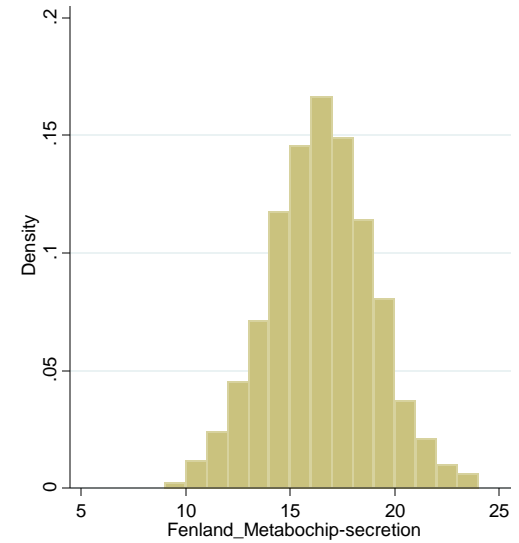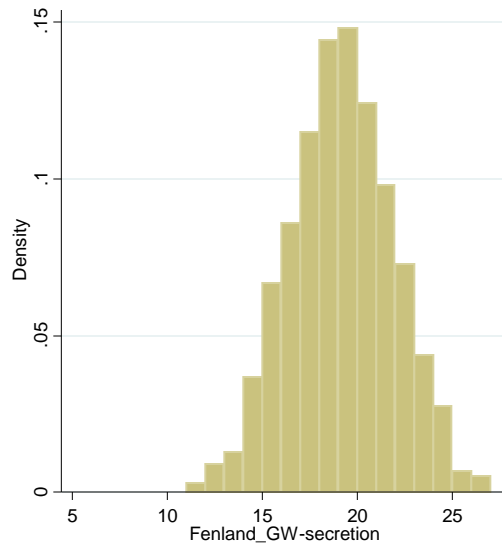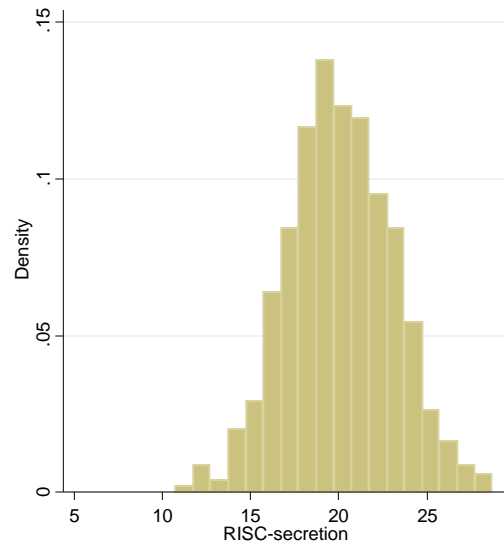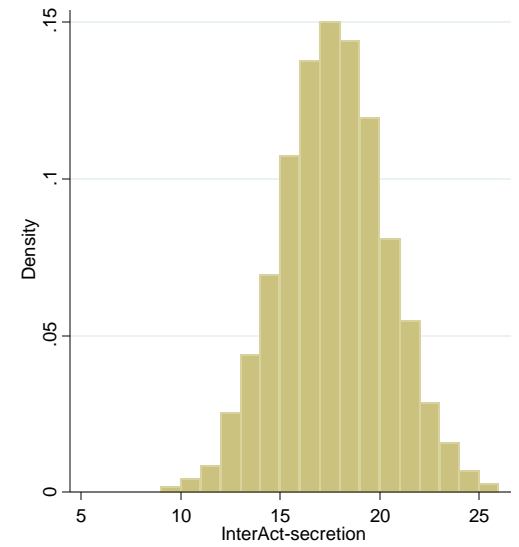

# Online Supplementary figure 2b

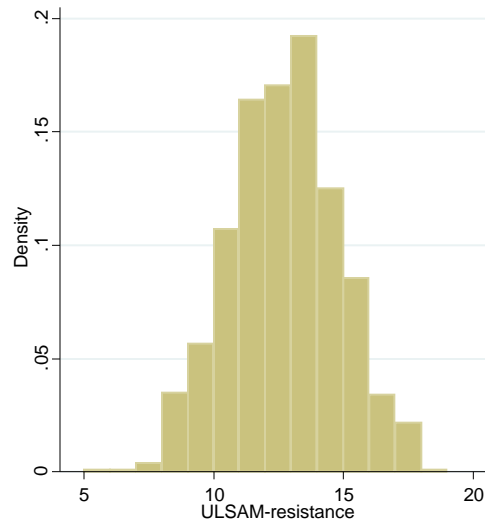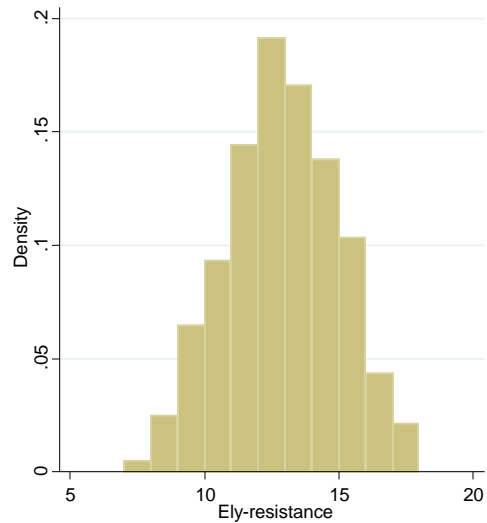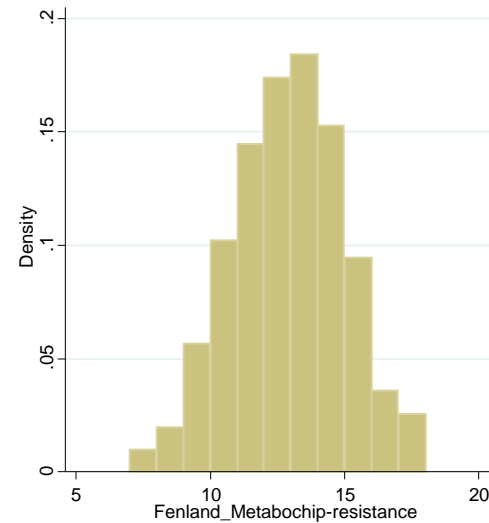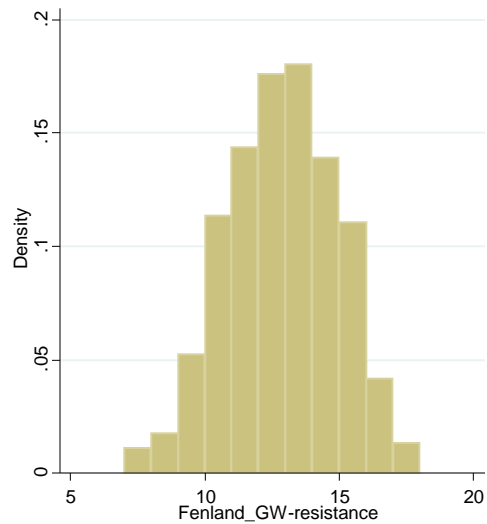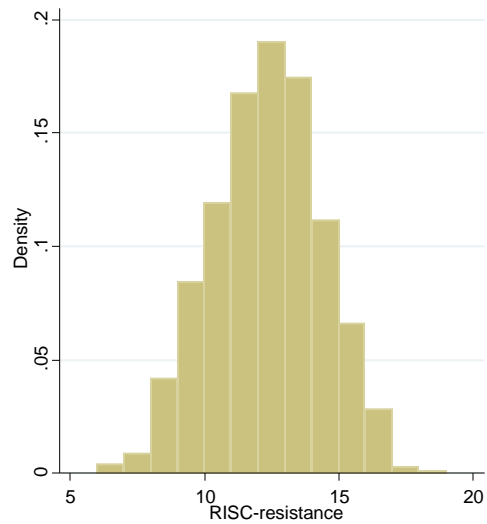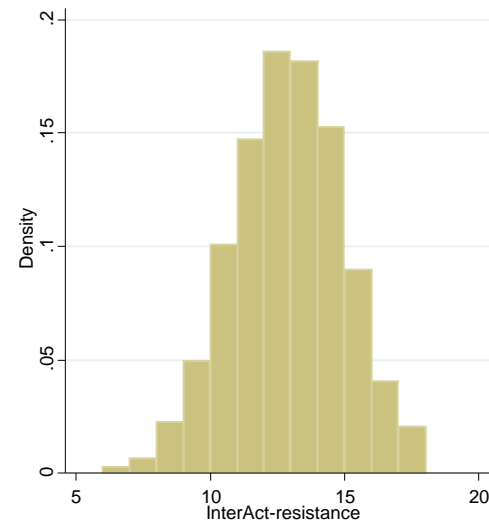

Supplement: NIHMS60480-supplement-01.pdf [file NIHMS60480-supplement-01.pdf]
